# Supplementary material for: Differential Function of a Novel Population of the CD19+CD24hiCD38hi Bregs in Psoriasis and Multiple Myeloma
Source: PubMed Central journal article supplement (PMC7920433; doi:10.3390/cells10020411), 2021-02-16
Supplement: cells-10-00411-s001.pdf [file cells-10-00411-s001.pdf]

# Differential Function of a Novel Population of the CD19+CD24hiCD38hi Bregs in Psoriasis and Multiple Myeloma

Supplementary Materials:

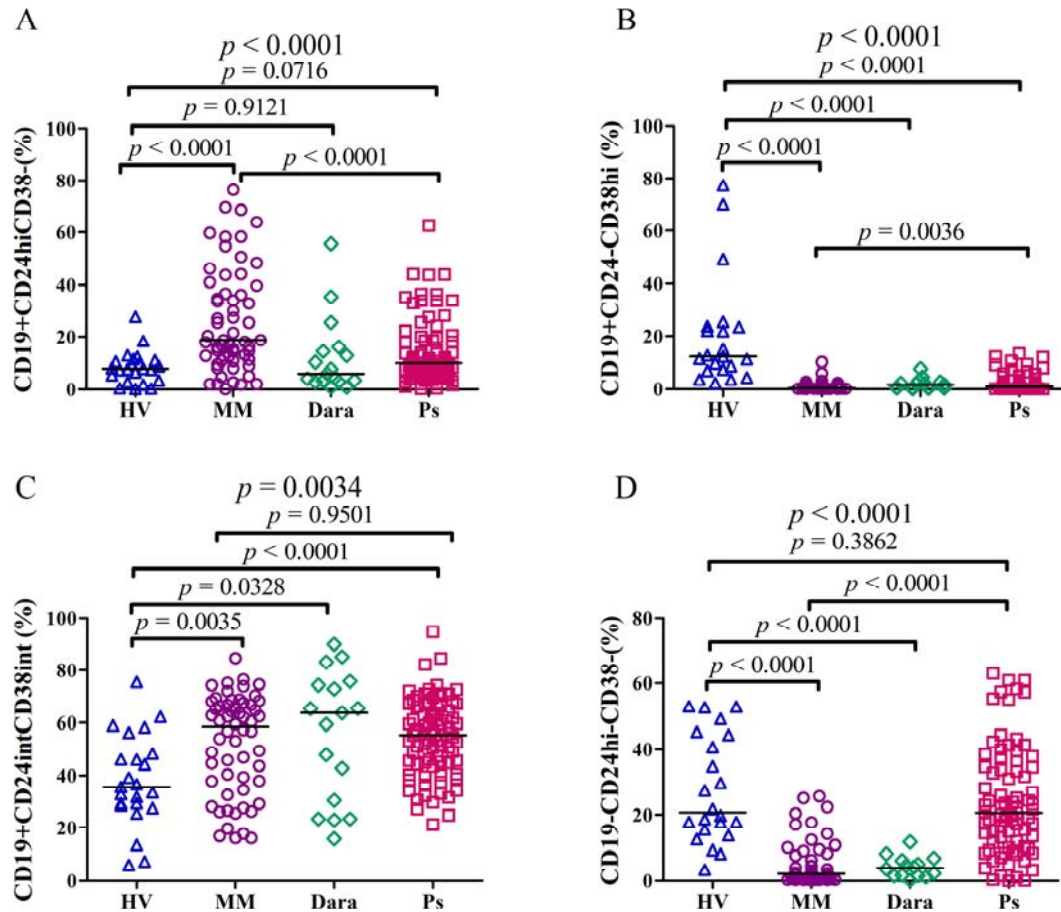

**Figure S1.** The comparison of percentages of other Breg subpopulations in HV, MM, Psoriatic and daratumumab patients: CD19+CD24hiCD38- (A), CD19+CD24-CD38hi (B), CD19+CD24intCD38int (C), CD19-CD24hi-CD38- (D).

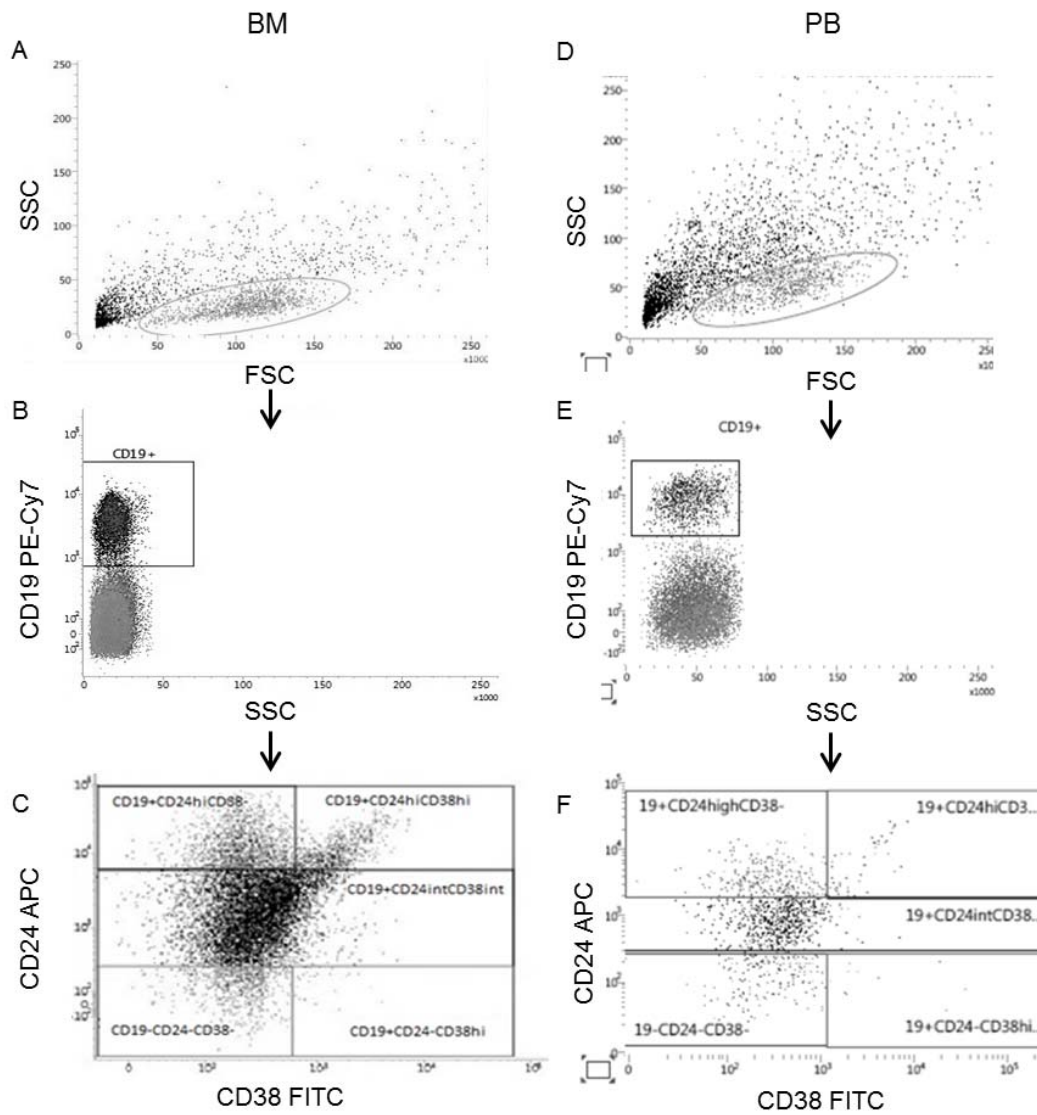

**Figure S2.** Gating strategy for evaluation of Breg cells in bone marrow (A–C) and peripheral blood (D–F). B cells gated from lymphocytes on SSC/FSC scatter dot plot (A,D), were defined as CD19+ lymphocytes. Within CD19+ B cells gate (B,E), CD24hiCD38hi cells were defined as CD24hiCD38hi Bregs (C,F).
